# Supplementary material for: Dyslipidemia Modified the Association Between Serum Uric Acid and First Hemorrhagic Stroke Among Chinese Population : A Community Based Nested Case-control Study
Source: Research Square preprint supplement (doi:10.21203/rs.3.rs-124307/v1), 2020-12-11
Supplement: Supplementary file 1 [file 4a6b5202a076976d0bc17e57.docx]

| Supplementary Table 1. Association between without or with dyslipidemia and hemorrhagic stroke. | | | | | | |
| --- | --- | --- | --- | --- | --- | --- |
|  |  | Model 1 | |  | Model 2 | |
|  | Cases/Controls | OR(95% CI) | P-Value |  | OR(95% CI) | P-Value |
| Dyslipidemia |  |  |  |  |  |  |
| no | 97/113 | Ref. |  |  | Ref. |  |
| yes | 258/242 | 1.24 (0.90, 1.72) | 0.189 |  | 1.19 (0.83, 1.69) | 0.339 |
| Model 1: Adjusted for none. | | | | | | |
| Model 2: Adjusted for sex, age, SBP, DBP, Smoking, Drinking, FBG, eGFR and anti-hypertensive drugs. | | | | | | |
