# Supplementary material for: Dyslipidemia Modified the Association Between Serum Uric Acid and First Hemorrhagic Stroke Among Chinese Population : A Community Based Nested Case-control Study
Source: Research Square preprint supplement (doi:10.21203/rs.3.rs-124307/v1), 2020-12-11
Supplement: Supplementary file 2 [file 8572e08737545a2933f4c27e.docx]

| Table S2：Analysis of effect of lipids components on SUA and hemorrhagic stroke. | | | |
| --- | --- | --- | --- |
| Variable | Case/Control | Adjusted OR (95%CI) | *P for interaction* |
| TG, mmol/L |  |  | 0.003 |
| TG<1.7 | 252/256 | 1.04 (0.89, 1.21) |  |
| TG≥1.7 | 103/99 | 1.45 (1.14, 1.85) |  |
| TC, mmol/L |  |  | 0.012 |
| TC<5.2 | 140/166 | 0.98 (0.82, 1.17) |  |
| TC≥5.2 | 215/189 | 1.34 (1.12, 1.60) |  |
| LDL-C, mmol/L |  |  | 0.045 |
| LDL-C<3.4 | 201/225 | 1.07 (0.92, 1.24) |  |
| LDL-C≥3.4 | 154/130 | 1.33 (1.07, 1.66) |  |
| HDL-C, mmol/L |  |  | 0.330 |
| HDL-C<1.0 | 16/17 | NA |  |
| HDL-C≥1.0 | 339/338 | 1.15 (1.02, 1.31) |  |
| Adjust for sex，age，BMI, SBP, DBP, Smoking, Drinking, FBG,eGFR and anti-hypertensive drugs. | | | |
